# Supplementary material for: Validation of Rapid Enzymatic Quantification of Acetic Acid in Vinegar on Automated Spectrophotometric System
Source: PubMed Central journal article supplement (PMC7353505; doi:10.3390/foods9060761), 2020-06-09
Supplement: foods-09-00761-s001.pdf [file foods-09-00761-s001.pdf]

**Table 1.** data considering calculating type A uncertainty.

| <b>X</b>                        | <b>Balsamic<br/>vinegar</b> | <b>Red wine<br/>vinegar</b> | <b>White wine<br/>vinegar</b> |
|---------------------------------|-----------------------------|-----------------------------|-------------------------------|
| 1                               | 5.8                         | 4.53                        | 5.43                          |
| 2                               | 5.86                        | 4.54                        | 5.43                          |
| 3                               | 5.86                        | 4.54                        | 5.45                          |
| 4                               | 5.89                        | 4.54                        | 5.46                          |
| 5                               | 5.8                         | 4.53                        | 5.45                          |
| 6                               | 5.9                         | 4.56                        | 5.51                          |
| 7                               | 5.83                        | 4.5                         | 5.5                           |
| 8                               | 5.85                        | 4.49                        | 5.58                          |
| 9                               | 5.83                        | 4.53                        | 5.49                          |
| 10                              | 5.85                        | 4.49                        | 5.49                          |
| $X_m$                           | 5.8470                      | 4.5250                      | 5.4820                        |
|                                 | $Y=16100x+452$              |                             |                               |
| Standard<br>deviation           | 0.033349996                 | 0.0237                      | 0.0429                        |
| Relative<br>deviation ( $s_r$ ) | 0.0057                      | 0.0052                      | 0.0078                        |
| $S(y/x)$                        | 108                         | 108                         | 108                           |
| $U(ct)$                         | 0.005                       | 0.005                       | 0.005                         |

**Table 2.** Type B systematic uncertainty estimates.

| Balsamic vinegar data considering calculating type B uncertainty   |          |          |           |          |          |          |          |
|--------------------------------------------------------------------|----------|----------|-----------|----------|----------|----------|----------|
|                                                                    | U(t)     | U(p)     | U(ct)     | U(mr)    | U(bt)    | U(m)     | U(k)     |
| Type B uncertainty $X_m$                                           | 0.030    | 0.020    | 0.005123  | 0.100000 | 0.025660 | 0.100000 | 0.3000   |
| Type B uncertainty $X_m/\text{radq}$                               | 0.001479 | 0.005774 | 0.001479  | 0.028868 | 0.007407 | 0.028868 | 0.086603 |
| The uncertainty $u$<br>( $X_m$ ) $_{B/X_m}$                        | 0.000074 | 0.001155 | 0.0000253 | 0.004937 | 0.000370 | 0.000289 | 0.000346 |
| Resulting relative<br>uncertainty $u(y)/y$                         | 0.00765  |          |           |          |          |          |          |
| Resulting uncertainty<br>$u(y)$                                    | 0.045    |          |           |          |          |          |          |
| Coverage factor $k$ ( $2 < k < 3$ )                                | 2        |          |           |          |          |          |          |
| Extended uncertainty<br>$U(y)$                                     | 0.089    |          |           |          |          |          |          |
| Red wine vinegar data considering calculating type A uncertainty   |          |          |           |          |          |          |          |
|                                                                    | U(t)     | U(p)     | U(ct)     | U(mr)    | U(bt)    | U(m)     | U(k)     |
| Type B uncertainty $X_m$                                           | 0.030    | 0.020000 | 0.005123  | 0.100000 | 0.025660 | 0.100000 | 0.3000   |
| Type B uncertainty<br>$X_m/\text{radq}$                            | 0.001479 | 0.005774 | 0.001479  | 0.028868 | 0.007407 | 0.028868 | 0.086603 |
| Uncertainty $u$ ( $X_m$ ) $_{B/X_m}$                               | 0.000074 | 0.001155 | 0.000327  | 0.006380 | 0.000370 | 0.000289 | 0.000346 |
| Resulting relative<br>uncertainty $u(y)/y$                         | 0.00835  |          |           |          |          |          |          |
| Resulting uncertainty<br>$u(y)$                                    | 0.038    |          |           |          |          |          |          |
| Coverage factor $k$ ( $2 < k < 3$ )                                | 2        |          |           |          |          |          |          |
| Extended uncertainty<br>$U(y)$                                     | 0.076    |          |           |          |          |          |          |
| White wine vinegar data considering calculating type B uncertainty |          |          |           |          |          |          |          |
|                                                                    | U(t)     | U(p)     | U(ct)     | U(mr)    | U(bt)    | U(m)     | U(k)     |
| Type B uncertainty $X_m$                                           | 0.030    | 0.020000 | 0.005123  | 0.100000 | 0.025660 | 0.100000 | 0.3000   |
| Type B uncertainty<br>$X_m/\text{radq}$                            | 0.001479 | 0.005774 | 0.001479  | 0.028868 | 0.007407 | 0.028868 | 0.086603 |
| Uncertainty $u$ ( $X_m$ ) $_{B/X_m}$                               | 0.000074 | 0.001155 | 0.000270  | 0.005266 | 0.000370 | 0.000289 | 0.000346 |
| Resulting relative<br>uncertainty $u(y)/y$                         | 0.00952  |          |           |          |          |          |          |
| Resulting uncertainty<br>$u(y)$                                    | 0.052    |          |           |          |          |          |          |
| Coverage factor $k$ ( $2 < k < 3$ )                                | 2        |          |           |          |          |          |          |

Extended uncertainty      0.104  
U(y)

---

**Table 3.** Red wine vinegar data.

| X  |      |                                                   |             |
|----|------|---------------------------------------------------|-------------|
| 1  | 4.53 | Data number (n)                                   | 10          |
| 2  | 4.54 | Media ( $X_m$ )                                   | 4.525       |
| 3  | 4.54 | Variance ( $s_r^2$ )                              | 0.000561111 |
| 4  | 4.54 | Standard deviation ( $s_r$ )                      | 0.023687784 |
| 5  | 4.53 | $t$ Student ( $v=n-1$ ; $p=0.95$ )                | 2.262157163 |
| 6  | 4.56 | Coefficient of variation ratio ( $CV_r\%$ )       | 0.523486939 |
| 7  | 4.5  | Minimum (min)                                     | 4.49        |
| 8  | 4.49 | Maximum (max)                                     | 4.56        |
| 9  | 4.53 | Range                                             | 0.07        |
|    |      | Median                                            | 4.53        |
|    |      | Media-upper confidence limit ( $p=0.95$ )         | 4.54194522  |
|    |      | Media-lower confidence limit ( $p=0.95$ )         | 4.50805478  |
| 10 | 4.49 | Media-confidence interval ( $p=0.95$ )            | 0.01694522  |
|    |      | Degrees of freedom ( $v=n-1$ )                    | 9           |
|    |      | <b>Normal Distribution (Shapiro-Wilk test 5%)</b> | <b>Yes</b>  |
|    |      | <b>Outlier (Huber test 5%)</b>                    | <b>No</b>   |

**Table 4.** Withe wine vinegar data.

---

| X  |      |                                                   |             |
|----|------|---------------------------------------------------|-------------|
| 1  | 5.43 | Data number (n)                                   | 10          |
| 2  | 5.43 | Media ( $X_m$ )                                   | 5.479       |
| 3  | 5.45 | Variance ( $s^2$ )                                | 0.00207667  |
| 4  | 5.46 | Standard deviation ( $s_r$ )                      | 0.045570458 |
| 5  | 5.45 | $t$ Student ( $v=n-1$ ; $p=0.95$ )                | 2.262157163 |
| 6  | 5.51 | Coefficient of variation ratio ( $CV_r\%$ )       | 0.831729481 |
| 7  | 5.5  | Minimum (min)                                     | 5.43        |
| 8  | 5.58 | Maximum (max)                                     | 5.58        |
| 9  | 5.49 | Range                                             | 0.15        |
|    |      | Median                                            | 5.475       |
|    |      | Media-upper confidence limit ( $p=0.95$ )         | 5.511599142 |
|    |      | Media-lower confidence limit ( $p=0.95$ )         | 5.446400858 |
| 10 | 5.49 | Media-confidence interval ( $p=0.95$ )            | 0.032599142 |
|    |      | Degrees of freedom ( $v=n-1$ )                    | 9           |
|    |      | <b>Normal Distribution (Shapiro-Wilk test 5%)</b> | <b>Yes</b>  |
|    |      | <b>Outlier (Huber test 5%)</b>                    | <b>No</b>   |

---

**Table 5.** Balsamic wine vinegar data.

| X  |      |                                                    |             |
|----|------|----------------------------------------------------|-------------|
| 1  | 5.8  |                                                    |             |
| 2  | 5.86 | Data number (n)                                    | 10          |
| 3  | 5.86 | Media (X <sub>m</sub> )                            | 5.847       |
| 4  | 5.89 | Variance (s <sub>r</sub> <sup>2</sup> )            | 0.001112222 |
| 5  | 5.8  | Standard deviation (s <sub>r</sub> )               | 0.033349996 |
| 6  | 5.9  | t Student (v=n-1; p=0.95)                          | 2.262157163 |
| 7  | 5.83 | Coefficient of variation ratio (CV <sub>r</sub> %) | 0.5703779   |
| 8  | 5.85 | Minimum (min)                                      | 5.8         |
| 9  | 5.83 | Maximum (max)                                      | 5.9         |
|    |      | Range                                              | 0.1         |
|    |      | Median                                             | 5.85        |
|    |      | Media-upper confidence limit (p=0.95)              | 5.87085715  |
| 10 | 5.85 | Media-lower confidence limit (p=0.95)              | 5.82314285  |
|    |      | Media-confidence interval (p=0.95)                 | 0.02385715  |
|    |      | Degrees of freedom (v=n-1)                         | 9           |
|    |      | <b>Normal Distribution (Shapiro-Wilk test 5%)</b>  | <b>Yes</b>  |
|    |      | <b>Outlier (Huber test 5%)</b>                     | <b>No</b>   |

**Table 6.** The upper and lower limit of repeatability.

| Degrees of freedom (v=n-1) | A      |                                                                                                                      | B     |
|----------------------------|--------|----------------------------------------------------------------------------------------------------------------------|-------|
| 1                          | 0.0316 |                                                                                                                      | 2.241 |
| 2                          | 0.160  |                                                                                                                      | 1.921 |
| 6                          | 0.454  | $A \leq \frac{\text{Standard deviation of analyzed samples}}{\text{Standard deviation of reference samples}} \leq B$ | 1.551 |
| 9                          | 0.548  |                                                                                                                      | 1.480 |
| 11                         | 0.589  |                                                                                                                      | 1.412 |
| 20                         | 0.692  |                                                                                                                      | 1.307 |
| 30                         | 0.748  |                                                                                                                      | 1.251 |

**Figure 1.** Standard calibration curve.

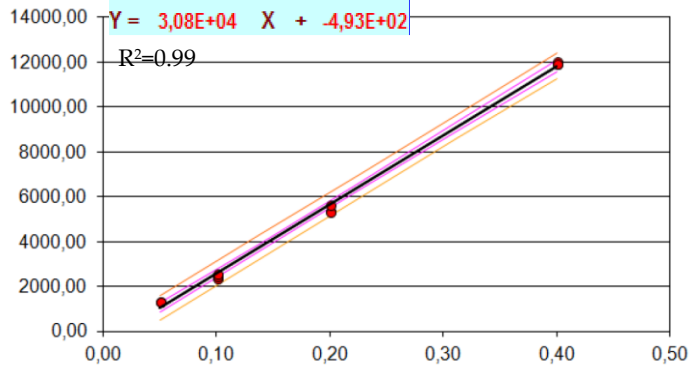

| X    | Y          | Ycalc    |
|------|------------|----------|
| 0,05 | 1295,3214  | 1,05E+03 |
| 0,1  | 2342,5698  | 2,59E+03 |
| 0,2  | 5355,2365  | 5,67E+03 |
| 0,4  | 11900,0324 | 1,18E+04 |
| 0,05 | 1292,4565  | 1,05E+03 |
| 0,1  | 2468,0978  | 2,59E+03 |
| 0,2  | 5340,1236  | 5,67E+03 |
| 0,4  | 12028,3265 | 1,18E+04 |
| 0,05 | 1288,0232  | 1,05E+03 |
| 0,1  | 2536,9523  | 2,59E+03 |
| 0,2  | 5652,2132  | 5,67E+03 |
| 0,4  | 11901,0521 | 1,18E+04 |



Figure 2. Normal residual probability.

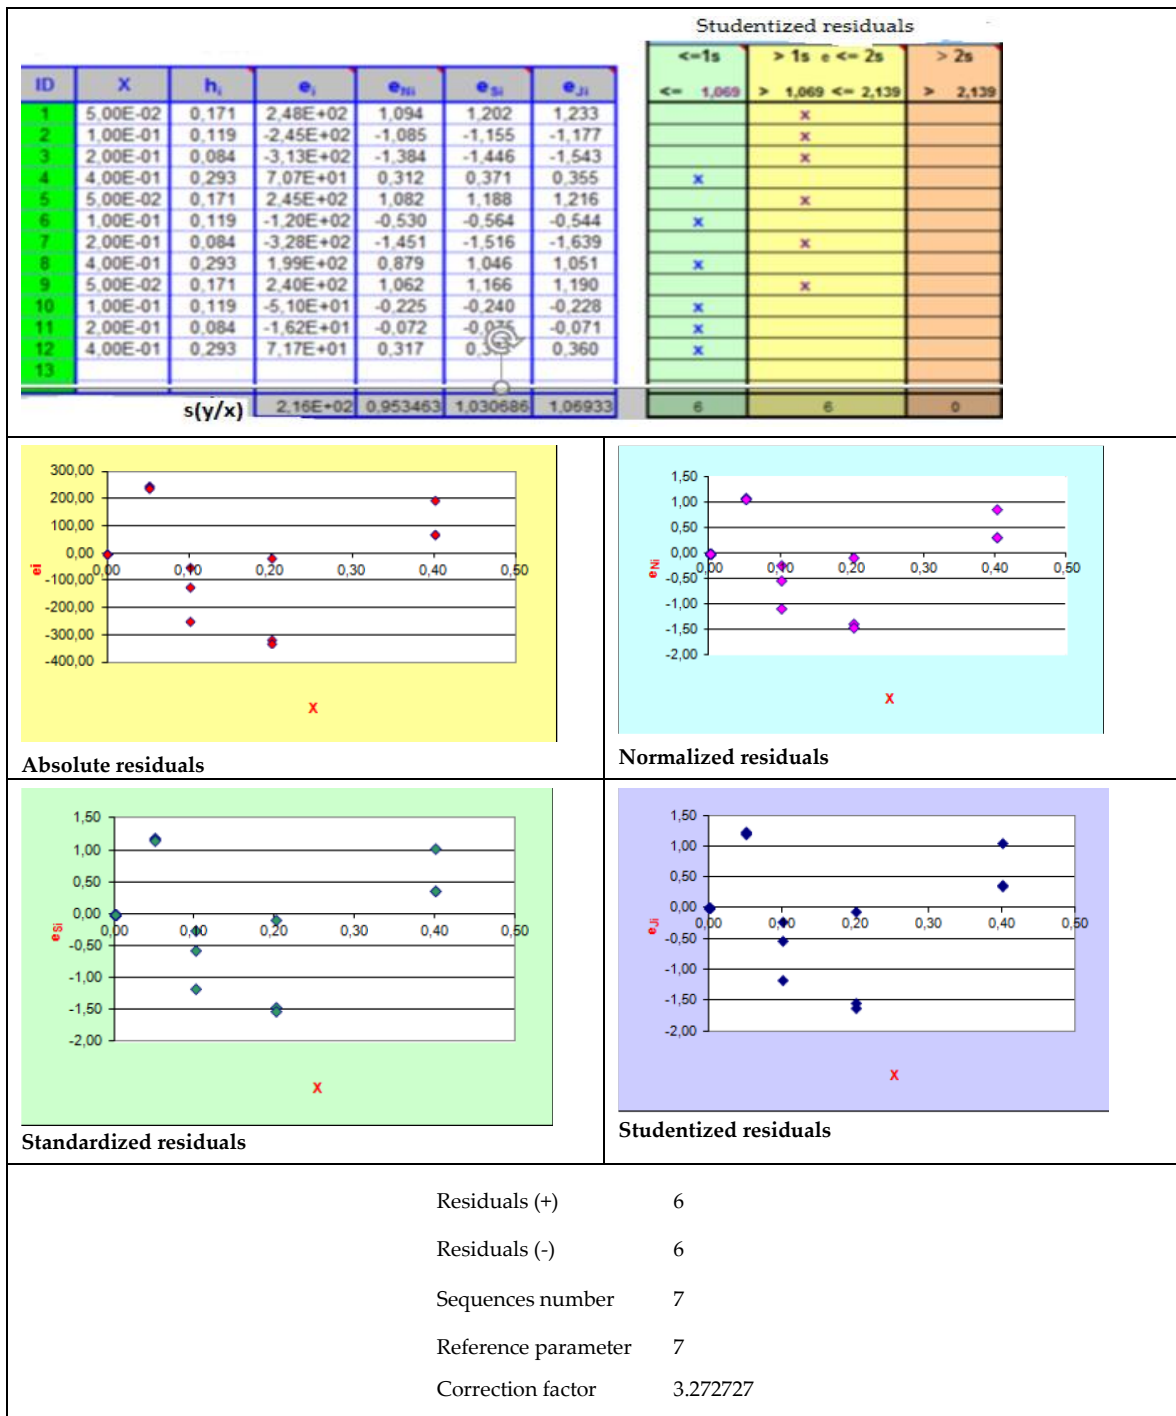

$h_i$  (leverages coefficient);  $e_i$  (absolute residuals);  $e_{Ni}$  (normalized residuals);  $e_{Si}$  (studentized residuals);  $e_{Ji}$  (standardized residuals)

Figure 3. Shapiro-Wilk test (5% significance levels).

| Red wine vinegar                                                                   |                                                                                    |
|------------------------------------------------------------------------------------|------------------------------------------------------------------------------------|
| <p>Community method</p>                                                            | <p>Enzymatic method</p>                                                            |
| <p>W statistic: 0.86<br/>p-value: 0.0701<br/>Do not reject the null hypothesis</p> | <p>W statistic: 0.87<br/>p-value: 1.1093<br/>Do not reject the null hypothesis</p> |
| Withe wine vinegar                                                                 |                                                                                    |
| <p>Community method</p>                                                            | <p>Enzymatic method</p>                                                            |
| <p>W statistic: 0.94<br/>p-value: 0.5540<br/>Do not reject the null hypothesis</p> | <p>W statistic: 0.89<br/>p-value: 1.843<br/>Do not reject the null hypothesis</p>  |
| Balsamic vinegar                                                                   |                                                                                    |
| <p>Community method</p>                                                            | <p>Enzymatic method</p>                                                            |
| <p>W statistic: 0.98<br/>p value: 0.9594<br/>Do not reject the null hypothesis</p> | <p>W statistic: 0.93<br/>p value: 0.4984<br/>Do not reject the null hypothesis</p> |

y=

normal theoretical quantile  
x= concentration

**Figure 4** Balsamic wine vinegar accuracy statistical analyses.

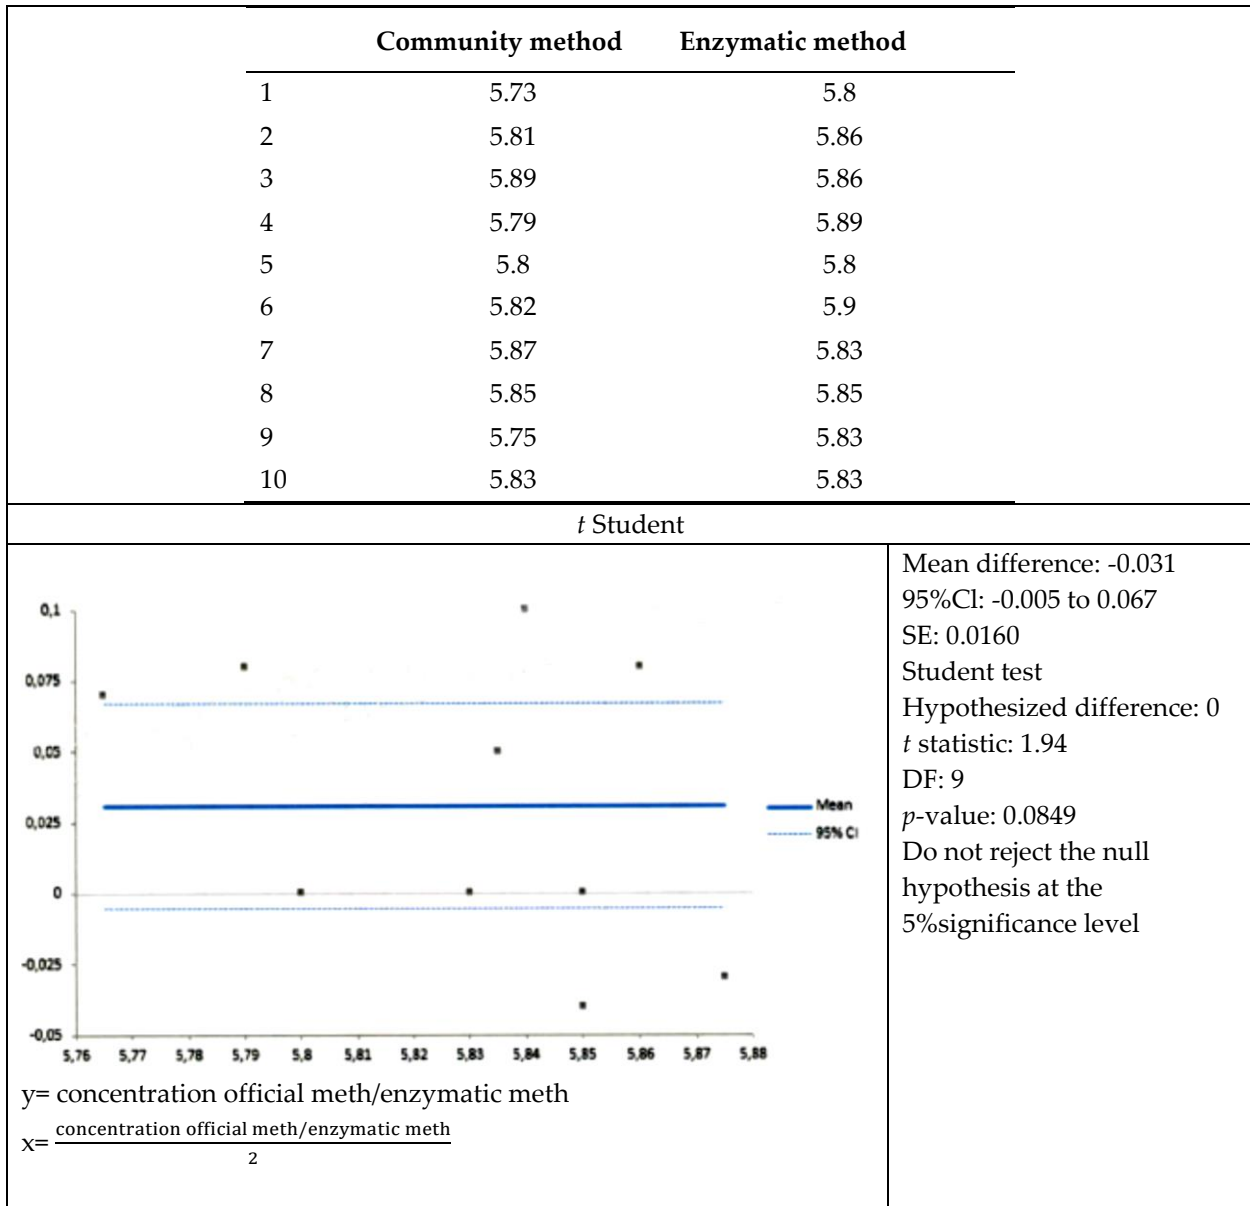

**Figure 5.** Red wine vinegar accuracy statistical analyses.

|    | Community method | Enzymatic method |
|----|------------------|------------------|
| 1  | 4.55             | 4.53             |
| 2  | 4.42             | 4.54             |
| 3  | 4.56             | 4.54             |
| 4  | 4.59             | 4.54             |
| 5  | 4.53             | 4.53             |
| 6  | 4.64             | 4.56             |
| 7  | 4.59             | 4.5              |
| 8  | 4.58             | 4.49             |
| 9  | 4.55             | 4.53             |
| 10 | 4.57             | 4.49             |

  

| <i>t</i> Student                                                                                                                                                                                                                                 |                                                                                                                                                                                                                                                                 |
|--------------------------------------------------------------------------------------------------------------------------------------------------------------------------------------------------------------------------------------------------|-----------------------------------------------------------------------------------------------------------------------------------------------------------------------------------------------------------------------------------------------------------------|
| 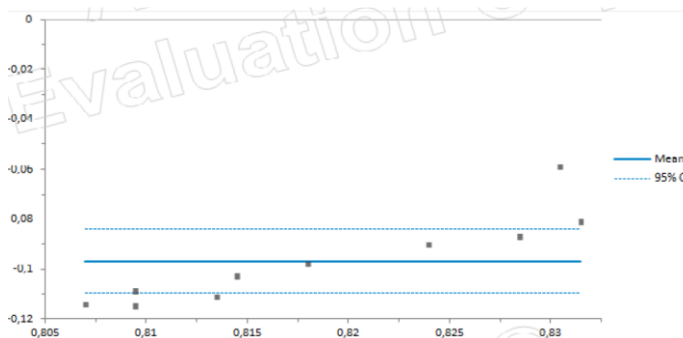 <p> <math>y = \text{concentration official meth/enzymatic meth}</math><br/> <math>x = \frac{\text{concentration official meth/enzymatic meth}}{2}</math> </p> | <p> Mean difference: 0.033<br/> 95%CI: -0.012 to 0.078<br/> SE: 0.0201<br/> Student test<br/> Hypothesized difference: 0<br/> t statistic: 1.65<br/> DF: 9<br/> <i>p</i>-value: 0.1343<br/> Do not reject the null hypothesis at the 5% significance level </p> |

Figure 6. White wine vinegar accuracy statistical analyses.

|    | Community method | Enzymatic method |
|----|------------------|------------------|
| 1  | 5.48             | 5.43             |
| 2  | 5.52             | 5.43             |
| 3  | 5.55             | 5.45             |
| 4  | 5.57             | 5.46             |
| 5  | 5.36             | 5.45             |
| 6  | 5.55             | 5.51             |
| 7  | 5.47             | 5.5              |
| 8  | 5.552            | 5.58             |
| 9  | 5.57             | 5.49             |
| 10 | 5.68             | 5.49             |

*t* Student

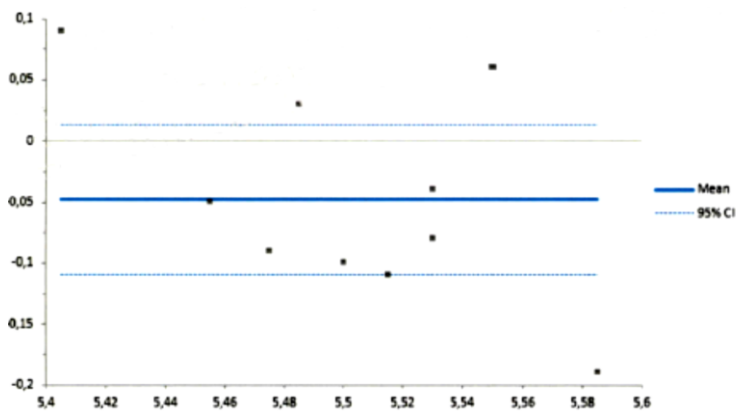

Mean difference: -0.048  
 95%CI: -0.109 to 0.013  
 SE: 0.0272  
 Student test  
 Hypotesized difference: 0  
*t* statistic: -1.77  
 DF: 9  
*p*-value: 0.1109  
 Do not reject the null hypothesis at the 5%significance level

y= concentration official meth/enzymatic meth

$$x = \frac{\text{concentration official meth/enzymatic meth}}{2}$$
